# Supplementary material
Source: PubMed Central journal article supplement (PMC4532298)
Supplement: NIHMS712636-supplement-Supp_Table_1.pdf [file NIHMS712636-supplement-Supp_Table_1.pdf]

**Supplementary Table 1.** Changes in adjusted mortality rate ratios (HR) over time for non-mosaic persons with Down syndrome with or without congenital heart defects, Denmark, 1977-2009

| Birth cohort       | Without congenital heart defects |                  |             |           | With congenital heart defects |                  |             |            |
|--------------------|----------------------------------|------------------|-------------|-----------|-------------------------------|------------------|-------------|------------|
|                    | Number of persons                | Number of deaths | Adjusted HR | 95% CI    | Number of persons             | Number of deaths | Adjusted HR | 95% CI     |
| 1977-1989          | 353                              | 29               | 1.00        | reference | 290                           | 134              | 7.11        | 4.75 10.64 |
| 1990-1999          | 272                              | 18               | 0.93        | 0.51 1.67 | 344                           | 52               | 2.43        | 1.42 4.16  |
| 2000-2007          | 104                              | 7                | 1.05        | 0.46 2.41 | 241                           | 25               | 1.55        | 0.67 3.57  |
| <b>P for trend</b> |                                  |                  | 0.995       |           |                               |                  | <0.001      |            |

Cox regression; adjusted for sex; CI: confidence interval.
