# Supplementary material
Source: PubMed Central journal article supplement (PMC4532298)
Supplement: NIHMS712636-supplement-Supp_Table_2.pdf [file NIHMS712636-supplement-Supp_Table_2.pdf]

**Supplementary Table 2.** Causes of death among persons with Down syndrome (DS) by karyotype, Denmark, 1968-2009

|                                                     | Standard trisomy 21 |       | Robertsonian<br>translocation DS |       | Mosaic DS |       |
|-----------------------------------------------------|---------------------|-------|----------------------------------|-------|-----------|-------|
|                                                     | n                   | %     | n                                | %     | n         | %     |
| <b>All persons with known causes of death</b>       |                     |       |                                  |       |           |       |
| Neoplasms                                           | 53                  | 5.8   | 1                                | 2.7   | 4         | 13.3  |
| Diseases of the nervous system and the sense organs | 53                  | 5.8   | 3                                | 8.1   | 4         | 13.3  |
| Diseases of the circulatory system                  | 111                 | 12.1  | 6                                | 16.2  | 8         | 26.7  |
| Disease of the respiratory system                   | 183                 | 20.0  | 6                                | 16.2  | 4         | 13.3  |
| All malformations                                   | 340                 | 37.1  | 17                               | 45.9  | 7         | 23.3  |
| Congenital heart defects                            | 304                 | 33.2  | 15                               | 40.5  | 5         | 16.7  |
| Other causes                                        | 176                 | 19.2  | 4                                | 10.8  | 3         | 10.0  |
| Total                                               | 916                 | 100.0 | 37                               | 100.0 | 30        | 100.0 |
| <b>Persons died before age of 20 years</b>          |                     |       |                                  |       |           |       |
| Neoplasms                                           | 24                  | 6.0   | 1                                | 4.5   | 1         | 16.7  |
| Diseases of the nervous system and the sense organs | 6                   | 1.5   | 1                                | 4.5   | 0         | 0.0   |
| Diseases of the circulatory system                  | 7                   | 1.8   | 2                                | 9.1   | 0         | 0.0   |

|                                                     |     |       |    |       |    |       |
|-----------------------------------------------------|-----|-------|----|-------|----|-------|
| Disease of the respiratory system                   | 32  | 8.0   | 2  | 9.1   | 0  | 0.0   |
| All malformations                                   | 286 | 71.5  | 16 | 72.7  | 5  | 83.3  |
| Congenital heart defects                            | 256 | 64.0  | 14 | 63.6  | 4  | 66.7  |
| Other causes                                        | 45  | 11.3  | 0  | 0.0   | 0  | 0.0   |
| Total                                               | 400 | 100.0 | 22 | 100.0 | 6  | 100.0 |
| <b>Persons died at age of 20 years or more</b>      |     |       |    |       |    |       |
| Neoplasms                                           | 29  | 5.6   | 0  | 0.0   | 3  | 12.5  |
| Diseases of the nervous system and the sense organs | 47  | 9.1   | 2  | 13.3  | 4  | 16.7  |
| Diseases of the circulatory system                  | 104 | 20.2  | 4  | 26.7  | 8  | 33.3  |
| Disease of the respiratory system                   | 151 | 29.3  | 4  | 26.7  | 4  | 16.7  |
| All malformations                                   | 54  | 10.5  | 1  | 6.7   | 2  | 8.3   |
| Congenital heart defects                            | 48  | 9.3   | 1  | 6.7   | 1  | 4.2   |
| Other causes                                        | 131 | 25.4  | 4  | 26.7  | 3  | 12.5  |
| Total                                               | 516 | 100.0 | 15 | 100.0 | 24 | 100.0 |
